# Supplementary material for: Neuropsychiatric Symptoms in Patients With Alzheimer’s Disease During SARS-COV-2 Pandemic in Peru
Source: PubMed Central journal article supplement — Am J Alzheimers Dis Other Demen. 2021 Aug 20;36:15333175211039089. doi: 10.1177/15333175211039089 (PMC10581147; doi:10.1177/15333175211039089), 2021-08-20
Supplement: sj-pdf-1-aja-10.1177_15333175211039089.pdf [file sj-pdf-1-aja-10.1177_15333175211039089.pdf]

## **Supplemental file**

### **Questionnaire on confinement**

1. Who do you live with? You can mark more than one answer
  - a. I live with my parents, siblings or other relatives
  - b. I live with my partner
  - c. I live with friends
  - d. I live alone
  - e. Other option: (specify)
2. Does your home have the following spaces? Check all that apply:
  - a. Room for study.
  - b. Library room.
  - c. Patio or garden.
  - d. Terrace or balcony.
  - e. none
3. Including you, ¿ cuántas people live in your home during this confinement?
4. Have any of these people been infected with the COVID-19 virus?
5. Before quarantine, what percentage of your time did you spend on the following activities?
  - a. To work (whether formal or not)
  - b. To study :
  - c. To do household chores (housewife) :
    - i. of the patient with dementia:
  - d. To recreation activities:
  - e. Other option: (specify)
6. Currently , ¿ Q HAT percentage of their time devoted to the following activities?
  - a. To work (whether formal or not):
  - b. To study :
  - c. To do household chores (housewife) :
  - d. Caring for the patient with dementia:
  - e. To recreation activities:
  - f. Other option: (specify)

The following questions are to meet s us opinions and behaviors regarding the coronavirus. There are no right or wrong answers. L and ask you to answer all and done with utmost sincerity.

7. How informed do you feel about the symptoms of the coronavirus and how to avoid its spread?
  - a. More or less informed
  - b. Well informed
  - c. Very knowledgeable
8. In your home, ¿ U sted part of members who have come to the outside during and l period of confinement? If so, specify the number of accumulated hours that, on

average, you are outdoors weekly. Consider going out for any reason (shopping, taking the pet, walking, among others).

9. In your home, do you have the responsibility to go shopping for the home?

The following questions are to learn about the changes you have experienced on a personal and family level during this period of confinement .

10. ¿ S iente that the epidemic has affected the coronavirus s or life?

- a. Yes
- b. Not

11. What difficulties have you experienced as a result of the coronavirus pandemic? Mark only those that have happened to you since the lockdown began .

- a. I have had to interrupt work partially / totally .
- b. I have had to partially / totally interrupt the study .
- c. My relationship with my partner has been negatively affected .
- d. My family relationships has n been affected negatively .
- e. My friendly relations has n affected negatively
- f. I have not been able to receive the treatment I needed for a mental health problem
- g. I have not been able to receive the treatment I needed for a physical illness.
- h. Other option: (specify)
- i. None of the above

12. What difficulties have lived s or family nearby as a result of the coronavirus pandemic? Mark only those that have befallen s or family since the quarantine began .

- a. One or more family members have lost their job or stopped working .
- b. Sometimes we have not had enough money to buy our food .
- c. A close family member has had or has coronavirus .
- d. A close relative has been or is hospitalized for coronavirus .
- e. I have lost a close family member to coronavirus .
- f. Other option: (specify)
- g. None of the above

13. During the quarantine, how has your relationship with your family changed?

- a. It has gotten worse (eg we fight more).
- b. It is the same as before.
- c. It has improved (eg, we communicate better).

14. During the quarantine, how has the income in your home changed?

- a. Little
- b. They stay the same.
- c. They have increased a bit.
- d. They have increased substantially.
